# Supplementary material for: Profiles of Inflammatory Cytokines in the Vitreous Fluid from Patients with Rhegmatogenous Retinal Detachment and Their Correlations with Clinical Features
Source: Hindawi journal article supplement (doi:10.1155/2016/4256183), 2016-01-01
Supplement: f1 [file 4256183.f1.pdf]

Supplementary Table. Concentrations of Intravitreal Cytokines

|                | RRD              | MH              | PDR               | ERM             | RVO               | ANOVA, <i>P</i> | RRD-MH, <i>P</i> | RRD-PDR, <i>P</i> |
|----------------|------------------|-----------------|-------------------|-----------------|-------------------|-----------------|------------------|-------------------|
| IL-1 $\beta$   | 34.5 [51.0]      | 13.5 [38.75]    | 41.0 [42]         | 30.5 [41.3]     | 60.3 [68.3]       | 0.265           | 0.515            | 0.338             |
| IL-1ra         | 42.0 [72.0]      | 28.5 [53.3]     | 64.0 [63]         | 57.0 [62.3]     | 65.5 [123.8]      | 0.267           | 0.216            | 0.534             |
| IL-2           | 39.0 [51.0]      | 34.8 [30.3]     | 43.0 [46.5]       | 37.0 [45.5]     | 51.5 [64.8]       | 0.811           | 0.828            | 0.594             |
| IL-4           | 23.5 [87.0]      | 18.0 [79.1]     | 74.0 [73.0]       | 80.0 [75.3]     | 90.3 [100.1]      | 0.511           | 0.392            | 0.601             |
| IL-5           | 28.0 [41.0]      | 4.8 [24.5]      | 23.5 [30.5]       | 21.0 [23.5]     | 25.8 [30.4]       | 0.136           | 0.041**          | 0.722             |
| IL-6           | 517.0 [1931.5]   | 77.3 [278.0]    | 918.0 [1703.0]    | 112.0 [303.75]  | 2116.5 [5464.0]   | < 0.001*        | 0.009**          | 0.037***          |
| IL-7           | 26.0 [87.0]      | 20.3 [87.3]     | 66.0 [95.5]       | 74.0 [64.3]     | 80.0 [120.0]      | 0.239           | 0.919            | 0.065             |
| IL-8           | 343.0 [1404.5]   | 94.5 [228.63]   | 2168.0 [3449.5]   | 168.0 [257.8]   | 4153.5 [12369.6]  | < 0.001*        | 0.007**          | < 0.001***        |
| IL-9           | 114.0 [416.0]    | 117.5 [339.3]   | 258.0 [369.0]     | 365.0 [302.5]   | 311.0 [231.8]     | 0.505           | 0.331            | 0.450             |
| IL-10          | 32.0 [47.0]      | 12.0 [41.4]     | 51.0 [60.0]       | 49.0 [40.0]     | 53.5 [86.25]      | 0.009*          | 0.289            | 0.016***          |
| IL-12          | 16.0 [49.0]      | 12.5 [47.8]     | 51.0 [68.5]       | 53.5 [47.3]     | 68.5 [89.3]       | 0.006*          | 0.460            | 0.005***          |
| IL-13          | 9.5 [43.5]       | 8.0 [34.6]      | 39.0 [47.0]       | 34.5 [44.3]     | 43.0 [62.1]       | 0.005*          | 0.239            | 0.003***          |
| IL-15          | 1075.0 [543.0]   | 1183.3 [260.1]  | 1153.5 [390.5]    | 1095.0 [593.3]  | 1317.0 [952.3]    | 0.693           | 0.377            | 0.180             |
| IL-17          | 56.5 [247.0]     | 53.5 [218.1]    | 213.5 [222.0]     | 240.5 [223.0]   | 198.8 [258.5]     | 0.902           | 0.874            | 0.760             |
| eotaxin        | 22.0 [73.0]      | 15.3 [68.3]     | 72.0 [78.0]       | 55.0 [60.8]     | 62.5 [108.1]      | 0.052           | 0.633            | 0.018             |
| bFGF           | 537.0 [545.3]    | 189.5 [541.0]   | 454.0 [525.0]     | 455.0 [560.8]   | 374.3 [475.1]     | 0.991           | 0.965            | 0.949             |
| G-CSF          | 63.0 [77.0]      | 13.5 [50.9]     | 62.0 [68.5]       | 59.0 [55.3]     | 68.0 [173.4]      | 0.026*          | 0.062            | 0.248             |
| GM-CSF         | 132.0 [641.0]    | 145.0 [629.3]   | 619.0 [666.5]     | 614.0 [585.3]   | 470.0 [649.8]     | 0.633           | 0.854            | 0.103             |
| IFN- $\alpha$  | 77.0 [233.0]     | 78.5 [197.1]    | 226.0 [234.0]     | 231.0 [207.3]   | 158.8 [252.6]     | 0.566           | 0.654            | 0.194             |
| IFN- $\gamma$  | 20.0 [54.5]      | 12.5 [46.6]     | 43.5 [47.0]       | 51.0 [45.0]     | 81.8 [67.8]       | 0.271           | 0.228            | 0.468             |
| MCP-1          | 8740.0 [20034.0] | 3471.3 [2930.6] | 10892.0 [16580.5] | 3132.0 [2318.5] | 19843.0 [23562.8] | < 0.001*        | < 0.001**        | 0.598             |
| MIP-1 $\alpha$ | 56.5 [70.0]      | 14.0 [61.3]     | 54.5 [62.0]       | 66.0 [61.8]     | 89.3 [103.5]      | 0.185           | 0.331            | 0.540             |
| MIP-1 $\beta$  | 478.0 [1202.0]   | 163.5 [495.8]   | 698.0 [921.5]     | 414.0 [387.0]   | 1170.8 [2237.6]   | 0.012*          | 0.041**          | 0.730             |
| IP-10          | 3531.0 [11016.0] | 390.0 [1091.8]  | 5858.0 [9544.5]   | 445.5 [2439.5]  | 10078.5 [22053.6] | < 0.001*        | < 0.001**        | 0.367             |
| PDGF           | 24.0 [49.0]      | 23.8 [43.4]     | 54.0 [90.5]       | 43.0 [65.5]     | 64.8 [113.9]      | 0.005*          | 0.331            | 0.004***          |
| RANTES         | 98.0 [240.5]     | 96.5 [101.4]    | 102.0 [301.5]     | 77.0 [270.8]    | 83.5 [287.5]      | 0.884           | 0.654            | 0.745             |
| VEGF           | 355.0 [489.0]    | 67.0 [300.6]    | 4765.0 [11165.5]  | 260.5 [391.8]   | 3434.3 [20982.8]  | < 0.001*        | 0.058            | < 0.001***        |

Median [quartile deviation] is presented.

\* : statistically significant difference by ANOVA conducted by Kruskal-Wallis test.

\*\*, \*\*\* : statistically significant differences by post hoc analysis conducted by Mann-Whitney U-test.
